# Supplementary material for: Corrigendum to “Efficacy Comparison of Five Different Acupuncture Methods on Pain, Stiffness, and Function in Osteoarthritis of the Knee: A Network Meta-Analysis”
Source: Hindawi journal article supplement (doi:10.1155/2019/3713197), 2019-11-20
Supplement: f1 [file 3713197.f1.pdf]

Results (MD, with 95% CI) of the network meta-analysis for pain scores.

|                     |                          |                             |                             |                          |                          |                             |
|---------------------|--------------------------|-----------------------------|-----------------------------|--------------------------|--------------------------|-----------------------------|
| Acupuncture         | 0.97 (-1.87, 3.72)       | -1.70 (-3.98, 0.53)         | -2.96 (-6.09, 0.16)         | 0.35 (-1.66, 2.34)       | 2.16 (-0.28, 4.74)       | -0.62 (-3.38, 2.24)         |
| -0.97 (-3.72, 1.87) | Education                | <b>-2.68 (-4.78, -0.65)</b> | <b>-3.94 (-6.97, -0.85)</b> | -0.64 (-2.62, 1.50)      | 1.21 (-1.72, 4.23)       | -1.60 (-4.40, 1.22)         |
| 1.70 (-0.53, 3.98)  | <b>2.68 (0.65, 4.78)</b> | Electro-acupuncture         | -1.26 (-3.50, 1.06)         | <b>2.04 (0.67, 3.55)</b> | <b>3.88 (1.64, 6.28)</b> | 1.09 (-0.78, 3.07)          |
| 2.96 (-0.16, 6.09)  | <b>3.94 (0.85, 6.97)</b> | 1.26 (-1.06, 3.50)          | Fire needle                 | <b>3.31 (0.68, 5.99)</b> | <b>5.14 (2.20, 8.24)</b> | <b>2.34 (0.35, 4.45)</b>    |
| -0.35 (-2.34, 1.66) | 0.64 (-1.50, 2.62)       | <b>-2.04 (-3.55, -0.67)</b> | <b>-3.31 (-5.99, -0.68)</b> | Sham needle              | 1.83 (-0.57, 4.30)       | -0.95 (-3.31, 1.36)         |
| -2.16 (-4.74, 0.28) | -1.21 (-4.23, 1.72)      | <b>-3.88 (-6.28, -1.64)</b> | <b>-5.14 (-8.24, -2.20)</b> | -1.83 (-4.30, 0.57)      | Waiting list             | <b>-2.78 (-5.38, -0.28)</b> |
| 0.62 (-2.24, 3.38)  | 1.60 (-1.22, 4.40)       | -1.09 (-3.07, 0.78)         | <b>-2.34 (-4.45, -0.35)</b> | 0.95 (-1.36, 3.31)       | <b>2.78 (0.28, 5.38)</b> | Warm needle                 |

\*Boldface and italic meant significance. (Note: if MD<0, it meant that the treatment in columns was more effective than that of the rows in NMA.)

Results (MD, with 95% CI) of the network meta-analysis for function scores.

|                      |                           |                               |                               |                              |                            |                               |
|----------------------|---------------------------|-------------------------------|-------------------------------|------------------------------|----------------------------|-------------------------------|
| Acupuncture          | 1.53 (-6.41, 8.71)        | -5.65 (-12.29, 0.04)          | -7.10 (-16.85, 1.57)          | -0.41 (-5.92, 4.87)          | 7.01 (-0.23, 14.16)        | -4.14 (-12.90, 3.28)          |
| -1.53 (-8.71, 6.41)  | Education                 | <b>-7.20 (-12.78, -1.95)</b>  | <b>-8.64 (-17.58, -0.16)</b>  | -1.98 (-7.38, 3.82)          | 5.48 (-2.72, 14.27)        | -5.66 (-14.06, 1.78)          |
| 5.65 (-0.04, 12.29)  | <b>7.20 (1.95, 12.78)</b> | Electro-acupuncture           | -1.44 (-8.36, 5.23)           | <b>5.23 (1.67, 9.45)</b>     | <b>12.74 (6.12, 19.78)</b> | 1.50 (-4.39, 7.02)            |
| 7.10 (-1.57, 16.85)  | <b>8.64 (0.16, 17.58)</b> | 1.44 (-5.23, 8.36)            | Fire needle                   | 6.67 (-0.71, 14.71)          | <b>14.14 (5.24, 23.91)</b> | 3.00 (-4.57, 10.05)           |
| 0.41 (-4.87, 5.92)   | 1.98 (-3.82, 7.38)        | <b>-5.23 (-9.45, -1.67)</b>   | -6.67 (-14.71, 0.71)          | Sham needle                  | <b>7.51 (0.36, 14.56)</b>  | -3.75 (-10.89, 2.55)          |
| -7.01 (-14.16, 0.23) | -5.48 (-14.27, 2.72)      | <b>-12.74 (-19.78, -6.12)</b> | <b>-14.14 (-23.91, -5.24)</b> | <b>-7.51 (-14.56, -0.36)</b> | Waiting list               | <b>-11.21 (-19.40, -3.92)</b> |
| 4.14 (-3.28, 12.90)  | 5.66 (-1.78, 14.06)       | -1.50 (-7.02, 4.39)           | -3.00 (-10.05, 4.57)          | 3.75 (-2.55, 10.89)          | <b>11.21 (3.92, 19.40)</b> | Warm needle                   |

\*Boldface and italic meant significance. (Note: if MD<0, it meant that the treatment in columns was more effective than that of the rows in NMA.)

Node-splitting plots for assessing consistency with respect to the decline in (WOMAC) pain scores.

| <b>Name</b>                       | <b>Direct Effect</b> | <b>Indirect Effect</b> | <b>Overall</b>       | <b>P-Value</b> |
|-----------------------------------|----------------------|------------------------|----------------------|----------------|
| Acupuncture, Sham needle          | 0.48 (-1.83, 2.96)   | -0.31 (-5.09, 4.50)    | 0.35 (-1.66, 2.34)   | 0.75           |
| Acupuncture, Waiting list         | 1.80 (-1.88, 5.44)   | 2.56 (-1.36, 6.71)     | 2.16 (-0.28, 4.74)   | 0.75           |
| Electro-acupuncture, Fire needle  | -2.66 (-5.81, 0.47)  | 0.19 (-3.00, 3.18)     | -1.26 (-3.50, 1.06)  | 0.18           |
| Electro-acupuncture, Sham needle  | 2.01 (0.49, 3.68)    | 2.74 (-2.38, 7.97)     | 2.04 (0.67, 3.55)    | 0.76           |
| Electro-acupuncture, Waiting list | 3.00 (-0.68, 6.67)   | 4.45 (1.27, 7.76)      | 3.88 (1.64, 6.28)    | 0.53           |
| Electro-acupuncture, Warm needle  | 2.65 (0.51, 4.62)    | -1.15 (-3.53, 1.40)    | 1.09 (-0.78, 3.07)   | 0.03           |
| Fire needle, Warm needle          | 1.53 (-0.58, 3.85)   | 4.47 (0.70, 7.98)      | 2.34 (0.35, 4.45)    | 0.18           |
| Waiting list, Warm needle         | -4.23 (-8.10, -0.47) | -1.64 (-5.04, 1.84)    | -2.78 (-5.38, -0.28) | 0.29           |

Node-splitting plots for assessing consistency with respect to the decline in (WOMAC) physical function scores.

| <b>Name</b>                       | <b>Direct Effect</b>   | <b>Indirect Effect</b> | <b>Overall</b>         | <b>P-Value</b> |
|-----------------------------------|------------------------|------------------------|------------------------|----------------|
| Acupuncture, Sham needle          | -0.02 (-6.35, 6.01)    | -2.73 (-16.16, 10.89)  | -0.41 (-5.92, 4.87)    | 0.68           |
| Acupuncture, Waiting list         | 5.72 (-4.19, 15.67)    | 8.64 (-3.29, 20.03)    | 7.01 (-0.23, 14.16)    | 0.66           |
| Electro-acupuncture, Fire needle  | -1.83 (-11.24, 7.48)   | -0.32 (-13.64, 11.99)  | -1.44 (-8.36, 5.23)    | 0.83           |
| Electro-acupuncture, Sham needle  | 5.09 (1.08, 9.65)      | 8.14 (-6.51, 22.86)    | 5.23 (1.67, 9.45)      | 0.66           |
| Electro-acupuncture, Waiting list | 12.04 (1.18, 22.55)    | 13.18 (4.18, 23.19)    | 12.74 (6.12, 19.78)    | 0.87           |
| Electro-acupuncture, Warm needle  | 3.13 (-4.57, 10.28)    | -0.93 (-10.73, 8.77)   | 1.50 (-4.39, 7.02)     | 0.47           |
| Fire needle, Warm needle          | 2.51 (-8.08, 13.24)    | 3.47 (-8.47, 14.82)    | 3.00 (-4.57, 10.05)    | 0.87           |
| Waiting list, Warm needle         | -14.36 (-26.78, -2.09) | -9.04 (-19.32, 0.61)   | -11.21 (-19.40, -3.92) | 0.48           |

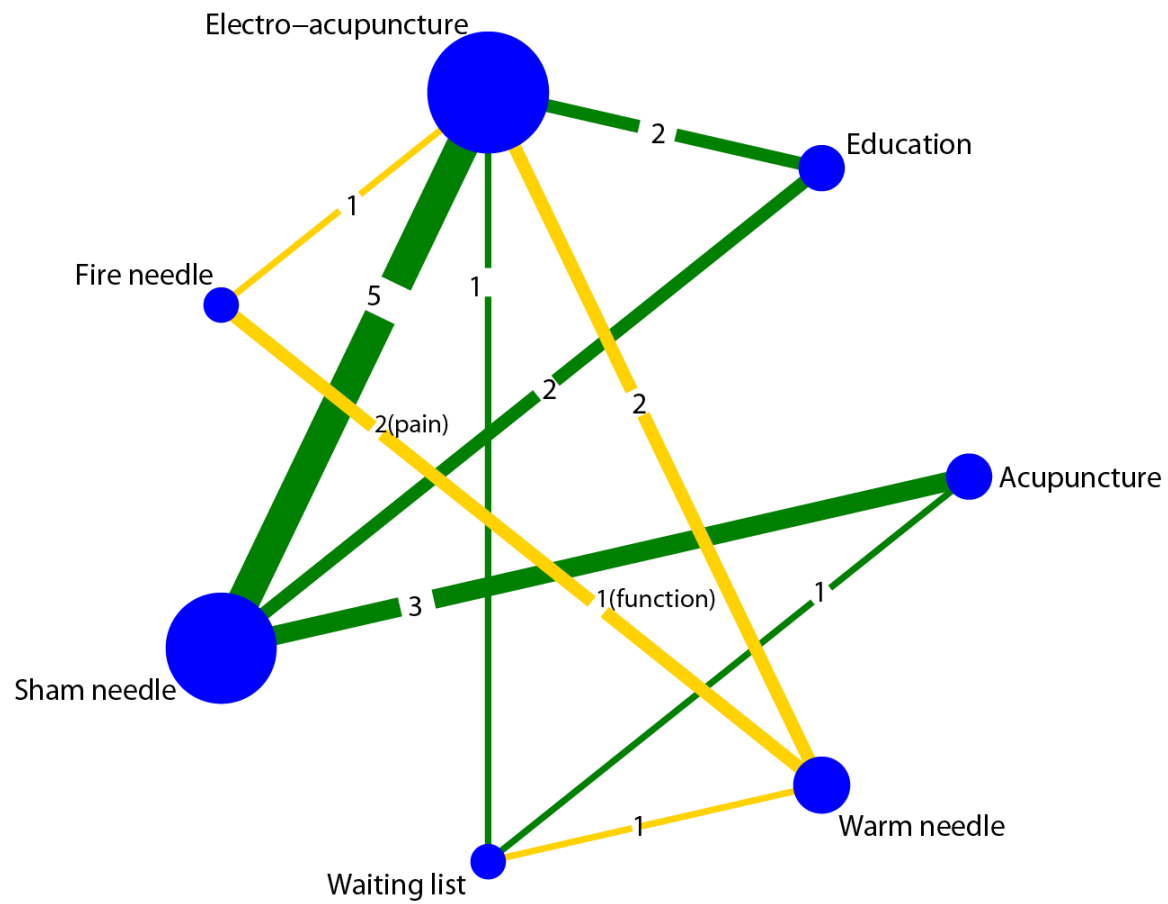

The Network comparison of acupuncture methods for KOA in pain and function.

Direct comparisons in the network

|                           | EAvsEDU | EAvsFN | EAvsSN | EAvsWL | EAvsWN | EDUvsSN | FNvsWN | MAvsSN | MAvsWL | WLvsWN |
|---------------------------|---------|--------|--------|--------|--------|---------|--------|--------|--------|--------|
| <b>Mixed estimates</b>    |         |        |        |        |        |         |        |        |        |        |
| EAvsEDU                   | 30.2    | 2.9    | 3.4    | 10.1   | 1.1    | 17.4    | 2.9    | 14.1   | 14.1   | 4.0    |
| EAvsFN                    | 3.3     | 48.6   | 0.7    | 5.5    | 6.1    | 3.3     | 15.5   | 3.9    | 3.9    | 9.4    |
| EAvsSN                    | 19.6    | 3.3    | 3.9    | 11.7   | 1.3    | 19.6    | 3.3    | 16.3   | 16.3   | 4.6    |
| EAvsWL                    | 12.4    | 5.9    | 2.5    | 20.7   | 2.3    | 12.4    | 5.9    | 14.9   | 14.9   | 8.2    |
| EAvsWN                    | 4.8     | 23.4   | 1.0    | 8.1    | 9.0    | 23.4    | 1.5    | 5.8    | 5.8    | 13.8   |
| EDUvsSN                   | 9.9     | 1.6    | 1.9    | 5.7    | 0.6    | 60.3    | 1.6    | 8.0    | 8.0    | 2.3    |
| FNvsWN                    | 3.4     | 15.9   | 0.7    | 5.6    | 6.3    | 3.4     | 47.2   | 4.0    | 4.0    | 9.6    |
| MAvsSN                    | 2.4     | 0.6    | 0.5    | 2.1    | 0.2    | 2.4     | 0.6    | 87.5   | 7.9    | 0.8    |
| MAvsWL                    | 10.6    | 2.6    | 2.1    | 9.1    | 1.0    | 10.6    | 2.6    | 12.7   | 45.3   | 3.6    |
| WLvsWN                    | 7.2     | 14.9   | 1.4    | 12.0   | 5.7    | 7.2     | 14.9   | 8.6    | 8.6    | 19.4   |
| <b>Indirect estimates</b> |         |        |        |        |        |         |        |        |        |        |
| EAvsMA                    | 17.4    | 3.4    | 3.5    | 11.8   | 1.3    | 17.4    | 3.4    | 20.9   | 16.4   | 4.6    |
| EDUvsFN                   | 18.2    | 21.8   | 1.9    | 4.0    | 2.2    | 13.0    | 9.4    | 11.1   | 11.1   | 7.2    |
| EDUvsMA                   | 7.5     | 1.3    | 1.0    | 4.7    | 0.5    | 37.2    | 1.3    | 38.2   | 6.5    | 1.8    |
| EDUvsWL                   | 12.4    | 2.6    | 0.5    | 9.2    | 1.0    | 23.0    | 2.6    | 22.5   | 22.5   | 3.6    |
| EDUvsWN                   | 15.7    | 13.2   | 1.5    | 1.1    | 5.1    | 13.9    | 13.2   | 12.5   | 12.5   | 11.3   |
| FNvsMA                    | 11.9    | 19.2   | 2.4    | 6.6    | 1.7    | 11.9    | 9.5    | 14.3   | 14.4   | 7.8    |
| FNvsSN                    | 12.8    | 19.6   | 2.6    | 6.0    | 1.8    | 12.8    | 9.4    | 13.6   | 13.6   | 7.6    |
| FNvsWL                    | 8.2     | 22.0   | 1.6    | 13.7   | 1.5    | 8.2     | 13.3   | 9.8    | 9.9    | 11.7   |
| MAvsWN                    | 10.8    | 12.4   | 2.2    | 4.2    | 4.8    | 10.8    | 12.4   | 12.9   | 16.9   | 12.6   |
| SNvsWL                    | 9.0     | 2.2    | 1.8    | 7.7    | 0.8    | 9.0     | 2.2    | 32.2   | 32.2   | 3.0    |
| SNvsWN                    | 11.2    | 12.2   | 2.2    | 3.4    | 4.7    | 11.2    | 12.2   | 15.4   | 15.4   | 12.0   |
| Entire network            | 12.1    | 12.3   | 2.0    | 7.7    | 2.9    | 14.3    | 9.7    | 16.5   | 14.4   | 8.1    |
| Included studies          | 2       | 1      | 5      | 1      | 2      | 2       | 2      | 3      | 1      | 1      |

PAIN

Direct comparisons in the network

|                           | EAvsEDU | EAvsFN | EAvsSN | EAvsWL | EAvsWN | EDUvsSN | FNvsWN | MAvsSN | MAvsWL | WLvsWN |
|---------------------------|---------|--------|--------|--------|--------|---------|--------|--------|--------|--------|
| <b>Mixed estimates</b>    |         |        |        |        |        |         |        |        |        |        |
| EAvsEDU                   | 10.3    | 4.7    | 12.9   | 1.5    | 22.6   | 3.5     | 18.0   | 18.0   | 5.0    |        |
| EAvsFN                    | 0.4     | 58.3   | 1.3    | 7.1    | 5.7    | 0.4     | 14.6   | 1.7    | 1.7    | 8.8    |
| EAvsSN                    | 1.9     | 5.1    | 6.7    | 18.6   | 2.1    | 1.9     | 5.1    | 25.8   | 25.8   | 7.2    |
| EAvsWL                    | 1.8     | 9.7    | 6.6    | 35.6   | 4.1    | 1.8     | 9.7    | 8.4    | 8.4    | 13.8   |
| EAvsWN                    | 0.7     | 25.0   | 2.4    | 13.2   | 10.6   | 0.7     | 25.0   | 3.1    | 3.1    | 16.3   |
| EDUvsSN                   | 14.6    | 2.3    | 3.0    | 8.4    | 1.0    | 42.0    | 2.3    | 11.6   | 11.6   | 3.3    |
| FNvsWN                    | 0.5     | 20.0   | 1.8    | 9.8    | 7.9    | 0.5     | 42.7   | 2.3    | 2.3    | 12.1   |
| MAvsSN                    | 0.3     | 0.3    | 1.0    | 0.9    | 0.1    | 0.3     | 0.3    | 95.3   | 0.4    |        |
| MAvsWL                    | 1.6     | 1.4    | 5.7    | 5.2    | 0.6    | 1.6     | 1.4    | 7.3    | 73.1   | 2.0    |
| WLvsWN                    | 1.0     | 16.1   | 3.4    | 18.5   | 6.8    | 1.0     | 16.1   | 4.4    | 4.4    | 28.4   |
| <b>Indirect estimates</b> |         |        |        |        |        |         |        |        |        |        |
| EAvsMA                    | 2.1     | 6.2    | 7.7    | 22.8   | 2.6    | 2.1     | 6.2    | 9.8    | 31.6   | 8.8    |
| EDUvsFN                   | 8.0     | 17.9   | 3.2    | 7.6    | 0.9    | 17.9    | 7.9    | 14.7   | 14.7   | 7.1    |
| EDUvsMA                   | 11.1    | 1.8    | 1.8    | 6.7    | 0.8    | 31.2    | 1.8    | 33.0   | 9.2    | 2.6    |
| EDUvsWL                   | 9.8     | 2.1    | 1.0    | 7.8    | 0.9    | 25.1    | 2.1    | 24.1   | 24.1   | 3.0    |
| EDUvsWN                   | 7.8     | 9.8    | 2.5    | 3.6    | 4.2    | 18.3    | 9.8    | 15.9   | 15.9   | 12.2   |
| FNvsMA                    | 1.5     | 21.2   | 5.4    | 14.8   | 0.5    | 1.5     | 11.4   | 7.0    | 25.7   | 10.9   |
| FNvsSN                    | 1.4     | 18.1   | 4.9    | 12.3   | 0.4    | 1.4     | 9.6    | 21.4   | 21.4   | 9.2    |
| FNvsWL                    | 1.2     | 27.8   | 4.2    | 22.7   | 0.3    | 1.2     | 16.1   | 5.4    | 5.4    | 15.8   |
| MAvsWN                    | 1.3     | 11.7   | 4.8    | 10.4   | 4.9    | 1.3     | 11.7   | 6.9    | 29.0   | 18.6   |
| SNvsWL                    | 1.1     | 1.0    | 3.9    | 3.6    | 0.4    | 1.1     | 1.0    | 43.2   | 43.2   | 1.4    |
| SNvsWN                    | 1.2     | 9.6    | 4.3    | 8.2    | 4.1    | 1.2     | 9.6    | 23.3   | 23.3   | 15.1   |
| Entire network            | 4.2     | 12.4   | 4.0    | 11.9   | 2.7    | 9.2     | 9.5    | 17.2   | 19.2   | 9.9    |
| Included studies          | 2       | 1      | 5      | 1      | 2      | 2       | 1      | 3      | 1      | 1      |

FUNCTION

Cumulative contribution plots for the KOA network by all interventions in pain and function.

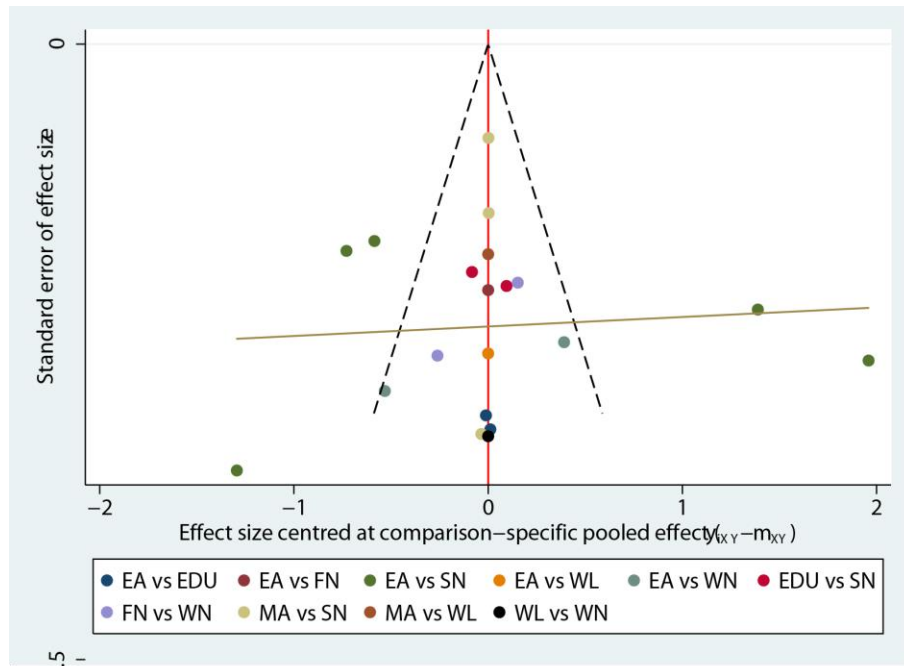

PAIN

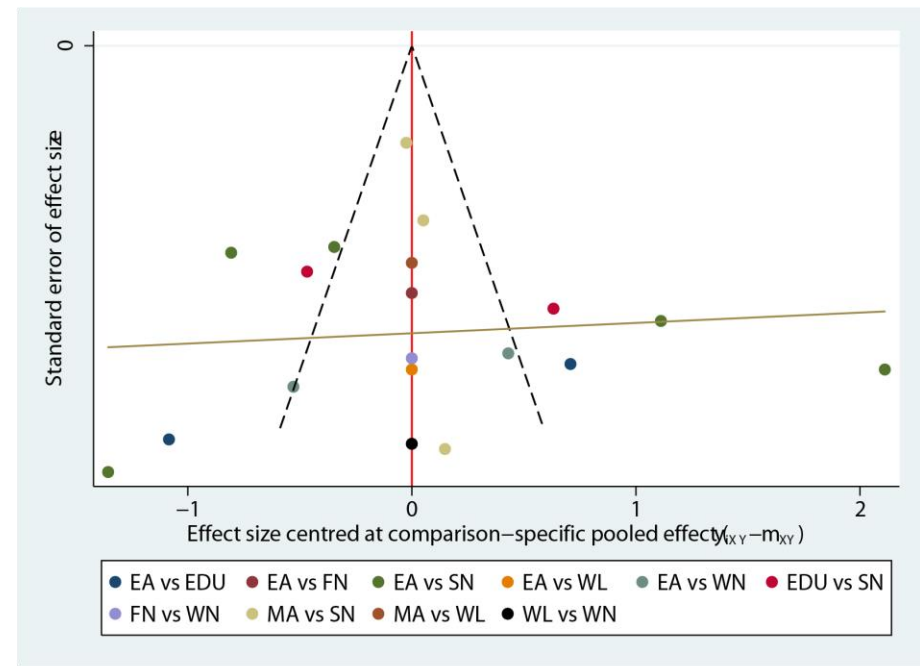

FUNCTION

Funnel plots of all included studies referring to (WOMAC) pain and physical function scores.

Results (MD, with 95% CI) of the pairwise meta-analysis for pain and function scores.

|          | Sham<br>needle VS<br>Education                  | Acupuncture<br>VS Sham<br>needle      | Electro-acu<br>puncture VS<br>Sham<br>needle | Electro-acupu<br>uncture VS<br>Warm needle | Acupunctur<br>e VS<br>Waiting list               | Electro-acu<br>puncture VS<br>Education | Electro-acupu<br>uncture VS<br>Waiting list       | Fire needle vs<br>Electro-acupu<br>uncture | Fire needle<br>VS Warm<br>needle | Warm<br>needle VS<br>Waiting<br>list              |
|----------|-------------------------------------------------|---------------------------------------|----------------------------------------------|--------------------------------------------|--------------------------------------------------|-----------------------------------------|---------------------------------------------------|--------------------------------------------|----------------------------------|---------------------------------------------------|
| Pain     | <i>-1.14</i><br><i>[-1.20,</i><br><i>-1.08]</i> | <i>-0.35 [-0.66,</i><br><i>-0.03]</i> | <i>-1.53 [-1.94,</i><br><i>-1.12]</i>        | <i>-2.35 [-3.92,</i><br><i>-0.78]</i>      | <i>-1.80 [-3.11,</i><br><i>-0.49]</i>            | <i>-2.09 [-2.15,</i><br><i>-2.03]</i>   | <i>-3.01 [-4.71,</i><br><i>-1.31]</i>             | <i>-2.57 [-3.67,</i><br><i>-1.47]</i>      | -1.70 [-4.25,<br>0.85]           | <i>-4.26</i><br><i>[-6.50,</i><br><i>-2.02]</i>   |
| Function | <i>-3.78</i><br><i>[-3.95,</i><br><i>-3.61]</i> | -0.20 [-0.56,<br>0.17]                | <i>-4.27 [-5.57,</i><br><i>-2.97]</i>        | 3.15 [-4.31,<br>10.61]                     | <i>-5.70</i><br><i>[-10.28,</i><br><i>-1.12]</i> | <i>-6.56 [-6.74,</i><br><i>-6.38]</i>   | <i>-11.98</i><br><i>[-18.01,</i><br><i>-5.95]</i> | <i>-1.80 [-3.11,</i><br><i>-0.49]</i>      | -1.74[-10.26<br>, 6.77]          | <i>-14.70</i><br><i>[-23.86,</i><br><i>-5.54]</i> |

Rank probabilities of all treatments with SUCRA values.

| Treatment           | Pain | Rank | Function | Rank |
|---------------------|------|------|----------|------|
| Acupuncture         | 0.54 | 4    | 0.62     | 5    |
| Education           | 0.78 | 6    | 0.75     | 6    |
| Electro-acupuncture | 0.18 | 2    | 0.17     | 2    |
| Fire needle         | 0.03 | 1    | 0.10     | 1    |
| Sham needle         | 0.63 | 5    | 0.59     | 4    |
| Waiting list        | 0.95 | 7    | 0.98     | 7    |
| Warm needle         | 0.42 | 3    | 0.30     | 3    |

Sensitivity Analysis of the included studies for pain.

|                                           | <b>MD</b> | <b>95%CI</b>   | <b>P-value</b> | <b>tau<sup>2</sup></b> | <b>I<sup>2</sup></b> |
|-------------------------------------------|-----------|----------------|----------------|------------------------|----------------------|
| <b>Sham needle VS Education</b>           |           |                |                |                        |                      |
| Omitting Berman 2004                      | -1.14     | [-1.22, -1.06] | < 0.001        | 0.00                   | -                    |
| Omitting Manheimer 2006                   | -1.14     | [-1.22, -1.06] | < 0.001        | 0.00                   | -                    |
| <b>Pooled estimate</b>                    | -1.14     | [-1.20, -1.08] | < 0.001        | 0.00                   | 0.00                 |
| <b>Acupuncture VS Sham needle</b>         |           |                |                |                        |                      |
| Omitting Chen 2013                        | -0.10     | [-0.47, 0.26]  | 0.58           | 0.00                   | 0.00                 |
| Omitting Scharf 2006                      | -0.48     | [-0.55, -0.41] | < 0.001        | 0.00                   | 0.00                 |
| Omitting Takeda 1994                      | -0.33     | [-0.70, 0.03]  | 0.07           | 0.05                   | 0.75                 |
| <b>Pooled estimate</b>                    | -0.35     | [-0.66, -0.03] | 0.03           | 0.04                   | 0.52                 |
| <b>Electro-acupuncture VS Sham needle</b> |           |                |                |                        |                      |
| Omitting Berman 2004                      | -2.25     | [-3.42, -1.08] | 0.0002         | 1.05                   | 0.97                 |
| Omitting Jubb 2008                        | -1.52     | [-1.94, -1.10] | < 0.001        | 0.13                   | 0.98                 |
| Omitting Sangdee 2002                     | -0.99     | [-1.18, -0.80] | < 0.001        | 0.02                   | 0.82                 |
| Omitting Vas 2004                         | -1.39     | [-1.78, -1.00] | < 0.001        | 0.12                   | 0.97                 |
| Omitting Manheimer 2006                   | -2.25     | [-3.42, -1.08] | 0.0002         | 1.05                   | 0.97                 |
| <b>Pooled estimate</b>                    | -1.53     | [-1.94, -1.12] | < 0.001        | 0.13                   | 0.97                 |
| <b>Electro-acupuncture VS Warm needle</b> |           |                |                |                        |                      |
| Omitting Gao 2012                         | -1.32     | [-3.45, 0.81]  | 0.02           | 0.00                   | -                    |
| Omitting Lu 2014                          | -2.97     | [-4.36, -1.58] | < 0.001        | 0.00                   | -                    |
| <b>Pooled estimate</b>                    | -2.35     | [-3.92, -0.78] | 0.03           | 0.52                   | 0.65                 |
| <b>Fire needle VS Warm needle</b>         |           |                |                |                        |                      |
| Omitting Fan 2016                         | -3.20     | [-5.26, -1.14] | 0.002          | 0.00                   | -                    |
| Omitting Zhang 2013                       | -0.57     | [-1.22, 0.08]  | 0.08           | 0.00                   | -                    |
| <b>Pooled estimate</b>                    | -1.70     | [-4.25, 0.85]  | 0.19           | 2.85                   | 0.82                 |
| <b>Electro-acupuncture VS Education</b>   |           |                |                |                        |                      |
| Omitting Berman 2004                      | -2.09     | [-2.17, -2.01] | < 0.001        | 0.00                   | -                    |
| Omitting Manheimer 2006                   | -2.09     | [-2.17, -2.01] | < 0.001        | 0.00                   | -                    |
| <b>Pooled estimate</b>                    | -2.09     | [-2.15, -2.03] | < 0.001        | 0.00                   | 0.00                 |

MD: mean difference, CI: confidence interval.



Sensitivity Analysis of the included studies for physical function.

|                                           | <b>MD 95%CI</b>      | <b>P-value</b> | <b>tau<sup>2</sup></b> | <b>I<sup>2</sup></b> |
|-------------------------------------------|----------------------|----------------|------------------------|----------------------|
| <b>Sham needle VS Education</b>           |                      |                |                        |                      |
| Omitting Berman 2004                      | -3.78 [-4.02, -3.54] | < 0.001        | 0.00                   | -                    |
| Omitting Manheimer 2006                   | -3.78 [-4.02, -3.54] | < 0.001        | 0.00                   | -                    |
| <b>Pooled estimate</b>                    | -3.78 [-3.95, -3.61] | < 0.001        | 0.00                   | 0.00                 |
| <b>Acupuncture VS Sham needle</b>         |                      |                |                        |                      |
| Omitting Chen 2013                        | -0.20 [-0.57, 0.17]  | 0.29           | 0.00                   | 0.00                 |
| Omitting Scharf 2006                      | -0.04 [-3.28, 3.21]  | 0.98           | 0.00                   | 0.00                 |
| Omitting Takeda 1994                      | -0.20 [-0.56, 0.17]  | 0.29           | 0.00                   | 0.00                 |
| <b>Pooled estimate</b>                    | -0.20 [-0.56, 0.17]  | 0.29           | 0.00                   | 0.00                 |
| <b>Electro-acupuncture VS Sham needle</b> |                      |                |                        |                      |
| Omitting Berman 2004                      | -5.89 [-9.55, -2.22] | 0.002          | 10.28                  | 0.97                 |
| Omitting Jubb 2008                        | -4.42 [-5.74, -3.10] | < 0.001        | 1.36                   | 0.97                 |
| Omitting Sangdee 2002                     | -2.78 [-3.45, -2.11] | < 0.001        | 0.23                   | 0.85                 |
| Omitting Vas 2004                         | -3.82 [-5.05, -2.59] | < 0.001        | 1.16                   | 0.97                 |
| Omitting Manheimer 2006                   | -5.92 [-9.43, -2.41] | 0.0009         | 9.26                   | 0.97                 |
| <b>Pooled estimate</b>                    | -4.27 [-5.57, -2.97] | < 0.001        | 1.35                   | 0.97                 |
| <b>Electro-acupuncture VS warm needle</b> |                      |                |                        |                      |
| Omitting Gao 2012                         | -5.60[-10.18,-1.02]  | < 0.001        | 0.00                   | -                    |
| Omitting Lu 2014                          | 3.15 [-4.31, 10.61]  | 0.41           | 0.00                   | -                    |
| <b>Pooled estimate</b>                    | -1.74[-10.26, 6.77]  | 0.40           | 28.32                  | 0.74                 |
| <b>Electro-acupuncture VS Education</b>   |                      |                |                        |                      |
| Omitting Berman 2004                      | -6.56 [-6.83, -6.29] | < 0.001        | 0.00                   | -                    |
| Omitting Manheimer 2006                   | -6.56 [-6.80, -6.32] | < 0.001        | 0.00                   | -                    |
| <b>Pooled estimate</b>                    | -6.56 [-6.74, -6.38] | < 0.001        | 0.00                   | 0.00                 |

MD: mean difference, CI: confidence interval.
